# Supplementary material for: Efficacy and safety of neoadjuvant chemotherapy regimens for triple-negative breast cancer: a network meta-analysis
Source: PubMed Central journal article supplement (PMC6738404; doi:10.18632/aging.102188), 2019-08-24
Supplement: aging-11-102188-s002.pdf [file aging-11-102188-s002.pdf]

## SUPPLEMENTARY TABLES

Please browse Full Text version to see the data of Supplementary Table 1

### Supplementary Table 1. Treatment characteristics of the eligible studies.

### Supplementary Table 2. Risk of bias assessments for included trials.

| Study                   | Selection bias-<br>Random<br>sequence<br>generation | Selection<br>bias-<br>Allocation<br>concealment | Performance<br>bias-Blinding<br>of<br>participants<br>and personnel | Detection<br>bias-<br>Blinding of<br>outcome<br>assessment | Attrition<br>bias-<br>Incomplete<br>outcome<br>data | Reporting<br>bias-<br>Selective<br>reporting | Other<br>bias |
|-------------------------|-----------------------------------------------------|-------------------------------------------------|---------------------------------------------------------------------|------------------------------------------------------------|-----------------------------------------------------|----------------------------------------------|---------------|
| Aft 2010                | +                                                   | +                                               | +                                                                   | +                                                          | +                                                   | +                                            | ?             |
| Houber 2010             | ?                                                   | ?                                               | +                                                                   | +                                                          | +                                                   | +                                            | +             |
| Bernsdorf 2011          | ?                                                   | ?                                               | +                                                                   | +                                                          | +                                                   | +                                            | ?             |
| Alba 2012               | +                                                   | +                                               | +                                                                   | +                                                          | +                                                   | +                                            | +             |
| Gerber 2013             | ?                                                   | ?                                               | +                                                                   | +                                                          | +                                                   | +                                            | +             |
| Ando 2014               | ?                                                   | ?                                               | +                                                                   | +                                                          | +                                                   | +                                            | +             |
| Earl 2014               | +                                                   | +                                               | +                                                                   | +                                                          | +                                                   | +                                            | +             |
| Gonzalez-Angulo<br>2014 | +                                                   | +                                               | +                                                                   | +                                                          | +                                                   | +                                            | +             |
| Steger 2014             | +                                                   | ?                                               | +                                                                   | +                                                          | +                                                   | +                                            | +             |
| von Minckwitz<br>2014   | +                                                   | +                                               | +                                                                   | +                                                          | +                                                   | +                                            | +             |
| Earl 2015               | +                                                   | +                                               | +                                                                   | +                                                          | +                                                   | +                                            | +             |
| Hasegawa 2015           | +                                                   | +                                               | +                                                                   | +                                                          | +                                                   | +                                            | ?             |
| Llombart-Cussac<br>2015 | ?                                                   | ?                                               | +                                                                   | +                                                          | +                                                   | +                                            | +             |
| Martinez 2015           | ?                                                   | ?                                               | +                                                                   | +                                                          | +                                                   | ?                                            | +             |
| Sikov 2015              | ?                                                   | ?                                               | +                                                                   | +                                                          | +                                                   | +                                            | +             |
| Nahleh 2016             | ?                                                   | ?                                               | +                                                                   | +                                                          | +                                                   | +                                            | +             |
| Zhang 2016              | ?                                                   | ?                                               | +                                                                   | +                                                          | +                                                   | +                                            | +             |
| Rugo 2016               | +                                                   | +                                               | +                                                                   | +                                                          | +                                                   | +                                            | +             |
| Enriquez 2017           | -                                                   | -                                               | +                                                                   | +                                                          | +                                                   | +                                            | +             |
| Gluz 2017               | ?                                                   | +                                               | +                                                                   | +                                                          | +                                                   | +                                            | +             |
| Jovanović 2017          | +                                                   | +                                               | +                                                                   | +                                                          | +                                                   | +                                            | +             |
| Loibl 2018              | +                                                   | +                                               | +                                                                   | +                                                          | +                                                   | +                                            | +             |
| Wu 2018                 | +                                                   | ?                                               | +                                                                   | +                                                          | +                                                   | +                                            | +             |

+ = low risk of bias; - = high risk of bias; ? = unclear risk of bias. Other bias is defined as the definition of pCR (i.e., whether it is defined clearly).

**Supplementary Table 3. Grade 3-4 hematological adverse events.**

| Study                | Arm design                                                                                             | NACT regimens | BC patients | No. of patients | Anemia | Neutropenia | Thrombocytopenia |
|----------------------|--------------------------------------------------------------------------------------------------------|---------------|-------------|-----------------|--------|-------------|------------------|
| Aft 2010             | Standard chemotherapeutic agents vs. Za-containing regimens                                            | TA            | NA          | NA              | NA     | NA          | NA               |
|                      |                                                                                                        | TAZa          | NA          | NA              | NA     | NA          | NA               |
| Houber 2010          | Standard chemotherapeutic agents vs. Ca-containing regimens                                            | TAC           | NA          | NA              | NA     | NA          | NA               |
|                      |                                                                                                        | TACCa         | NA          | NA              | NA     | NA          | NA               |
| Bernsdorf 2011       | Standard chemotherapeutic agents vs. G-containing regimens                                             | AC            | ER-         | NA              | NA     | NA          | NA               |
|                      |                                                                                                        | ACG           | ER-         | NA              | NA     | NA          | NA               |
| Alba 2012            | Standard chemotherapeutic agents vs. P-containing regimens                                             | TAC           | TNBC        | 46              | 0      | 10          | 0                |
|                      |                                                                                                        | TACP          | TNBC        | 47              | 5      | 8           | 3                |
| Gerber 2013          | Standard chemotherapeutic agents vs. B-containing regimens                                             | TAC           | Her2-       | 963             | 16/963 | 747/939     | 15/963           |
|                      |                                                                                                        | TACB          | Her2-       | 951             | 17/950 | 763/936     | 20/951           |
| Steger 2014          | Standard chemotherapeutic agents vs. Ca-containing regimens                                            | TA            | NA          | NA              | NA     | NA          | NA               |
|                      |                                                                                                        | TACa          | NA          | NA              | NA     | NA          | NA               |
| Ando 2014            | Standard chemotherapeutic agents vs. P-containing regimens                                             | TACF          | Her2-       | 91              | 1      | 35          | 0                |
|                      |                                                                                                        | TACFP         | Her2-       | 88              | 17     | 58          | 1                |
| Earl 2014            | Standard chemotherapeutic agents vs. Ge-containing regimens                                            | TAC           | All         | 404             | 3      | 135         | 2                |
|                      |                                                                                                        | TACGe         | All         | 408             | 0      | 146         | 0                |
| Gonzalez-Angulo 2014 | Standard chemotherapeutic agents vs. E-containing regimens                                             | TACF          | TNBC        | 27              | 1      | 11          | 2                |
|                      |                                                                                                        | TACFE         | TNBC        | 23              | 4      | 12          | 1                |
| von Minckwitz 2014   | B-containing regimens vs. BP-containing regimens                                                       | TAB           | TNBC/Her2+  | 293             | 1      | 79          | 1                |
|                      |                                                                                                        | TABP          | TNBC/Her2+  | 295             | 45     | 192         | 42               |
| Earl 2015            | Standard chemotherapeutic agents vs. B-containing regimens                                             | TACF          | All         | 391             | NA     | 146         | NA               |
|                      |                                                                                                        | TACFB         | All         | 384             | NA     | 168         | NA               |
| Hasegawa 2015        | Standard chemotherapeutic agents vs. Za-containing regimens                                            | TACF          | Her2-       | 95              | NA     | 34          | NA               |
|                      |                                                                                                        | TACFZa        | Her2-       | 91              | NA     | 39          | NA               |
| Llombart-Cussac 2015 | Standard chemotherapeutic agents vs. Pi-containing regimens                                            | T             | TNBC        | 46              | NA     | 2           | NA               |
|                      |                                                                                                        | TPi           | TNBC        | 94              | NA     | 5           | NA               |
| Martinez 2015        | Standard chemotherapeutic agents vs. P-containing regimens                                             | TACF          | NA          | NA              | NA     | NA          | NA               |
|                      |                                                                                                        | TAP           | NA          | NA              | NA     | NA          | NA               |
| Sikov 2015           | Standard chemotherapeutic agents vs. B-containing regimens vs. P-containing regimens vs. BP-containing | TAC           | TNBC        | 107             | 0      | 24          | 4                |
|                      |                                                                                                        | TACB          | TNBC        | 105             | 2      | 28          | 3                |
|                      |                                                                                                        | TACP          | TNBC        | 111             | 4      | 62          | 22               |
|                      |                                                                                                        | TACBP         | TNBC        | 110             | 6      | 74          | 29               |

|                |                                                                                                     |                       |                      |                   |               |                |               |
|----------------|-----------------------------------------------------------------------------------------------------|-----------------------|----------------------|-------------------|---------------|----------------|---------------|
|                | regimens                                                                                            |                       |                      |                   |               |                |               |
| Nahleh<br>2016 | Standard<br>chemotherapeutic<br>agents vs. B-containing<br>regimens                                 | TAC<br>TACB           | NA<br>NA             | NA<br>NA          | NA<br>NA      | NA<br>NA       | NA<br>NA      |
|                | Standard<br>chemotherapeutic<br>agents vs. P-containing<br>regimens                                 | TA<br>TP              | TNBC<br>TNBC         | 44<br>47          | NA<br>NA      | 28<br>34       | 0<br>17       |
| Rugo<br>2016   | Standard<br>chemotherapeutic<br>agents vs. PPI-<br>containing regimens                              | TAC<br>TACPPi         | Her2-<br>Her2-       | 44<br>72          | 0<br>20       | 1<br>51        | 0<br>15       |
|                | Standard<br>chemotherapeutic<br>agents vs. P-containing<br>regimens                                 | TAC<br>TP             | NA<br>NA             | NA<br>NA          | NA<br>NA      | NA<br>NA       | NA<br>NA      |
| Gluz 2017      | Ge-containing<br>regimens vs. P-<br>containing regimens                                             | TGe<br>TP             | TNBC<br>TNBC         | 180<br>151        | NA<br>NA      | 29<br>24       | 2<br>0        |
|                | P-containing regimens<br>vs. PE-containing<br>regimens                                              | TP<br>TPE             | TNBC<br>TNBC         | 49<br>96          | 1<br>6        | 5<br>25        | 0<br>0        |
| Loibl<br>2018  | Standard<br>chemotherapeutic<br>agents vs. P-containing<br>regimens vs. PPI-<br>containing regimens | TAC<br>TACP<br>TACPPi | TNBC<br>TNBC<br>TNBC | 157<br>158<br>313 | 0<br>27<br>77 | 4<br>84<br>179 | 0<br>10<br>33 |
|                | Standard<br>chemotherapeutic<br>agents vs. P-containing<br>regimens                                 | TA<br>TAP             | TNBC<br>TNBC         | 60<br>61          | 6<br>32       | 14<br>24       | 1<br>21       |

A, anthracyclines; B, bevacizumab; C, cyclophosphamide; Ca, capecitabine; E, everolimus; F, fluorouracil; G, gefitinib; Ge, gemcitabine; P, platinum salts; Pi, Poly(ADP-ribose) polymerases (PARPs); T, taxanes; Za, zoledronic acid; NA, not available.
